# Supplementary material
Source: MDPI journal article supplement (https://www.mdpi.com/2073-4441/15/21/3753)
Supplement: s1 [file s1]

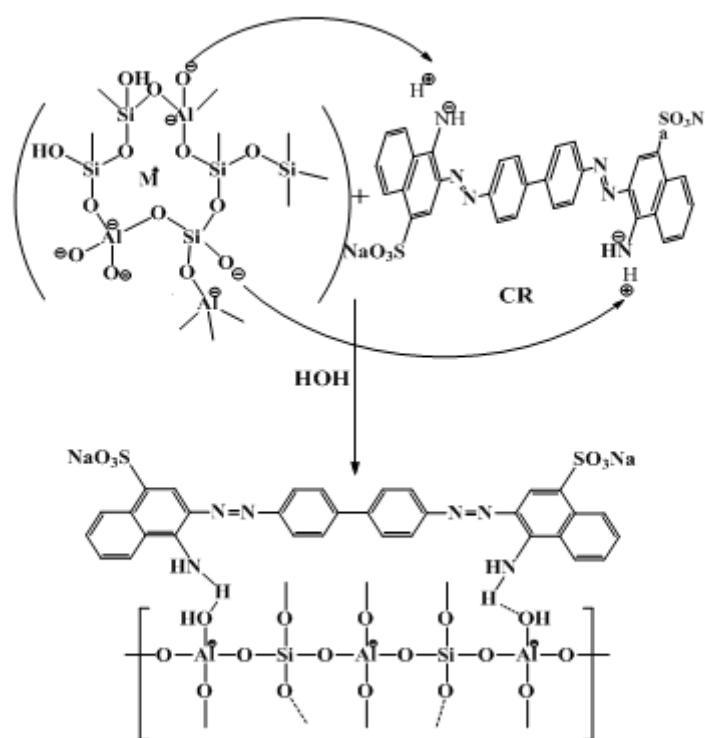

**Figure S1.** Schematic representation for mechanism of interaction between CR and glauconite.

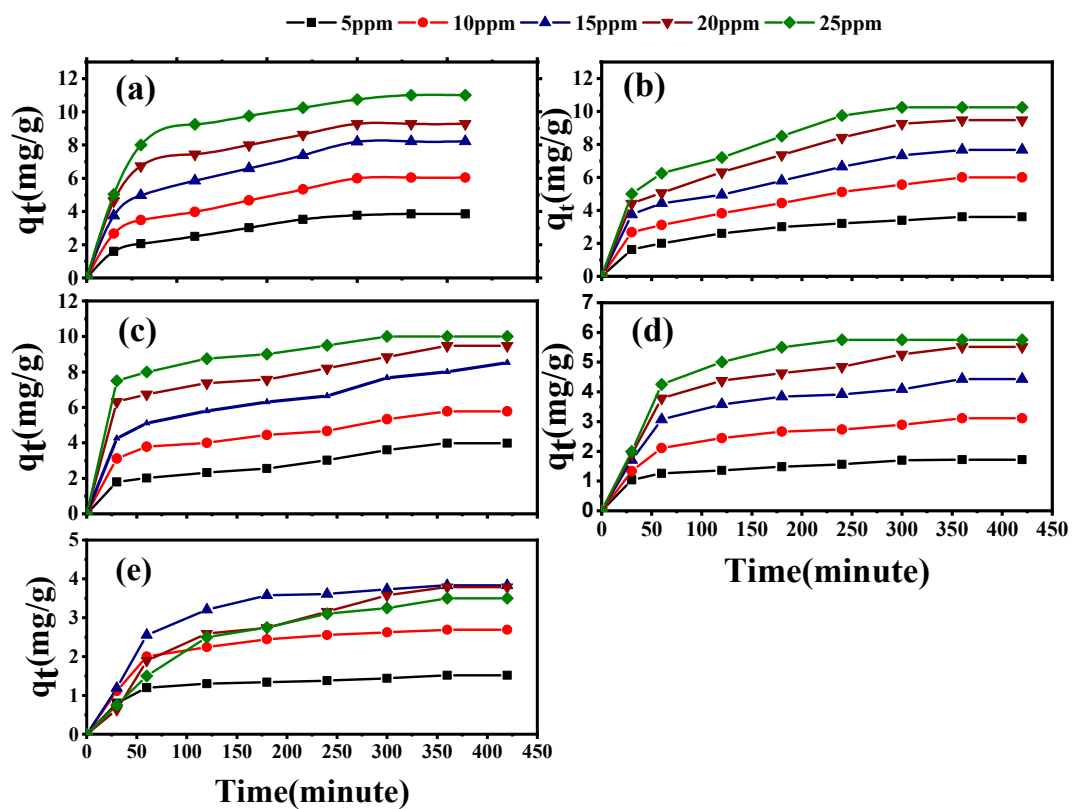

**Figure S2.** Effect of CR dye concentrations and contact time on the adsorbed quantity of CR dye at 25 °C and pH 7 by 20 mg of (a)GL (b) GLACT1M (c)GLACT2M (d) GLACT3M and (d) GLACT4M.

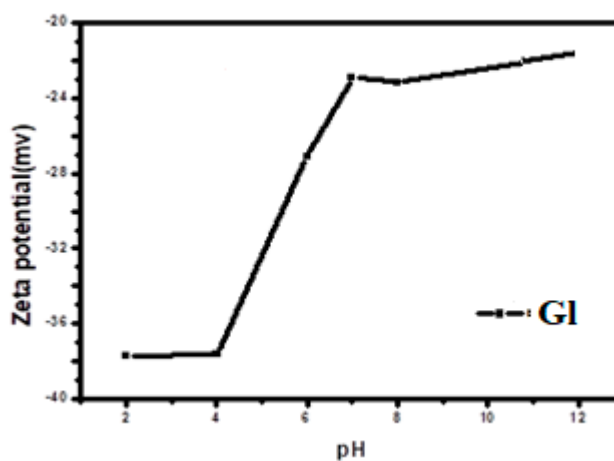

**Figure S3.** The zeta potential for GL as a function of pH.

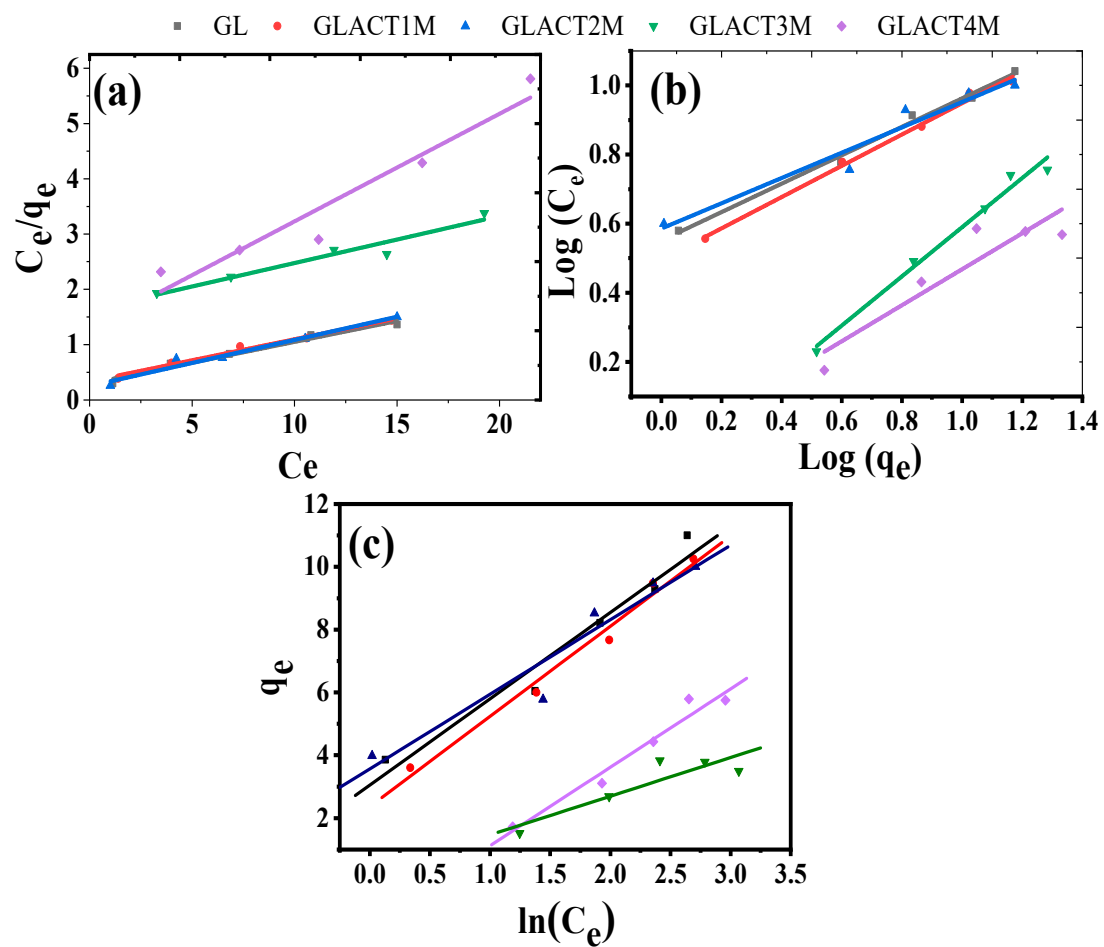

**Figure S4.** Plots of adsorption isotherms for the adsorption of CR dye by 20 mg of GL, GLACT1M, GLACT2M, GLACT3M, and GLACT4M at 25°C and pH 7; (a) Langmuir isotherms model, (b) Freundlich isotherms model and (c) Tempkin isotherms model.

**Table S1.** Conditions of experimental tests. CR dye adsorption tests were carried out using a range of parameters, including starting dye concentrations, adsorbent dosages, pH values, and temperatures.

| Series | Dye concentration, ppm | Adsorbent dose, g              | Temperature, °C               | pH value             |
|--------|------------------------|--------------------------------|-------------------------------|----------------------|
| 1      | 5, 10, 15, 20 and 25   | 0.02                           | 25                            | 7                    |
| 2      | 5                      | 0.02, 0.04, 0.06, 0.08 and 0.1 | 25                            | 7                    |
| 3      | 5                      | 0.02                           | 25, 40, 50, 60, 70, 80 and 90 | 7                    |
| 4      | 5                      | 0.02                           | 25                            | 2, 4, 6, 7, 8 and 12 |

**Table S2.** Parameters of the kinetic models for CR dye adsorption on GL, GLACT1M, GLACT2M, GLACT3M, and GLACT4M.

| Catalyst | Conc, (ppm) | First order  |              |        |        | Second order |              |        |        | Elovich kinetic model |                   |        |
|----------|-------------|--------------|--------------|--------|--------|--------------|--------------|--------|--------|-----------------------|-------------------|--------|
|          |             | $q_{e calc}$ | $q_{e exp.}$ | $k_1$  | $R^2$  | $q_{e calc}$ | $q_{e exp.}$ | $k_2$  | $R^2$  | $\beta$ (g/mg)        | $\alpha$ (mg/min) | $R^2$  |
| GL       | 25          | 2.84         | 11.00        | 0.0044 | 0.4314 | 12.02        | 11.00        | 0.0022 | 0.9990 | 0.4689                | 0.2365            | 0.9455 |
|          | 20          | 3.53         | 9.28         | 0.0039 | 0.6656 | 10.18        | 9.28         | 0.0025 | 0.9975 | 0.5790                | 0.4281            | 0.9673 |
|          | 15          | 4.07         | 8.22         | 0.0066 | 0.2841 | 9.42         | 8.22         | 0.0017 | 0.9925 | 0.5579                | 0.0866            | 0.9802 |
|          | 10          | 3.02         | 6.04         | 0.0052 | 0.2946 | 7.08         | 6.04         | 0.0020 | 0.9860 | 0.7276                | 0.1114            | 0.9632 |
|          | 5           | 1.83         | 3.86         | 0.0038 | 0.2484 | 4.60         | 3.86         | 0.0028 | 0.9891 | 1.0647                | 0.1758            | 0.9718 |
| GLACT1M  | 25          | 4.55         | 10.25        | 0.0047 | 0.6663 | 11.71        | 10.25        | 0.0016 | 0.9926 | 0.4568                | 0.0690            | 0.9689 |
|          | 20          | 5.21         | 9.47         | 0.0056 | 0.5906 | 11.09        | 9.47         | 0.0012 | 0.9878 | 0.4670                | 0.0337            | 0.9621 |
|          | 15          | 3.94         | 7.67         | 0.0045 | 0.6381 | 8.84         | 7.67         | 0.0016 | 0.9818 | 0.6227                | 0.1203            | 0.9425 |
|          | 10          | 3.18         | 6.00         | 0.0039 | 0.6602 | 7.05         | 6.00         | 0.0017 | 0.9822 | 0.7331                | 0.0972            | 0.9573 |
|          | 5           | 1.34         | 3.60         | 0.0024 | 0.2150 | 4.11         | 3.60         | 0.0039 | 0.9960 | 1.2513                | 0.3082            | 0.9931 |
| GLACT2M  | 25          | 1.87         | 10.00        | 0.0023 | 0.4191 | 10.46        | 10.00        | 0.0049 | 0.9983 | 0.9736                | 48.555            | 0.9765 |
|          | 20          | 3.21         | 9.47         | 0.0035 | 0.7887 | 10.08        | 9.47         | 0.0027 | 0.9886 | 0.8096                | 5.6616            | 0.9072 |
|          | 15          | 4.77         | 8.52         | 0.0048 | 0.8429 | 9.26         | 8.52         | 0.0018 | 0.9774 | 0.6488                | 0.2788            | 0.9376 |
|          | 10          | 2.37         | 5.78         | 0.0030 | 0.5866 | 6.36         | 5.78         | 0.0028 | 0.9785 | 0.9961                | 0.6174            | 0.9187 |
|          | 5           | 2.14         | 3.98         | 0.0028 | 0.5051 | 4.74         | 3.98         | 0.0021 | 0.9383 | 1.1472                | 0.2204            | 0.8659 |
| GLACT3M  | 25          | 1.83         | 5.75         | 0.0024 | 0.2187 | 6.47         | 5.75         | 0.0037 | 0.9916 | 0.7584                | 0.1789            | 0.8666 |
|          | 20          | 2.32         | 5.52         | 0.0037 | 0.4850 | 6.27         | 5.52         | 0.0027 | 0.9940 | 0.7980                | 0.1527            | 0.9358 |
|          | 15          | 1.79         | 4.43         | 0.0031 | 0.3940 | 4.91         | 4.43         | 0.0041 | 0.9955 | 1.0646                | 0.3222            | 0.9383 |
|          | 10          | 1.34         | 3.11         | 0.0026 | 0.2509 | 3.43         | 3.11         | 0.0061 | 0.9963 | 1.5834                | 0.5199            | 0.9680 |
|          | 5           | 0.67         | 1.72         | 0.0027 | 0.0817 | 1.85         | 1.72         | 0.0158 | 0.9958 | 3.7942                | 1.1535            | 0.9789 |
| GLACT4M  | 25          | 2.20         | 3.50         | 0.0050 | 0.5324 | 4.71         | 3.50         | 0.0016 | 0.9881 | 0.9343                | 0.0593            | 0.9895 |
|          | 20          | 2.62         | 3.79         | 0.0052 | 0.5631 | 5.40         | 3.79         | 0.0011 | 0.9428 | 0.8631                | 0.0447            | 0.9770 |
|          | 15          | 1.45         | 3.84         | 0.0054 | 0.3433 | 4.42         | 3.84         | 0.0041 | 0.9919 | 1.0608                | 0.2042            | 0.9131 |
|          | 10          | 0.83         | 2.69         | 0.0043 | 0.2204 | 2.96         | 2.69         | 0.0086 | 0.9982 | 1.8132                | 0.6043            | 0.9145 |
|          | 5           | 0.33         | 1.52         | 0.0012 | 0.0251 | 1.61         | 1.52         | 0.0205 | 0.9974 | 4.1411                | 1.0913            | 0.9145 |

**Table S3.** Intra-particle diffusion constant for GL, GLACT2M, and GLACT4M for adsorption of 15 ppm CR at 25°C.

| Catalyst | Stage | Intraparticle diffusion kinetic model |                |
|----------|-------|---------------------------------------|----------------|
|          |       | $k_3$ ( mg/g min <sup>1/2</sup> )     | R <sup>2</sup> |
| GL       | 1     | 0.30935                               | 0.96291        |
|          | 2     | 0.18142                               | 0.99410        |
|          | 3     | 0.06367                               | 0.99977        |
| GLACT2M  | 1     | 0.59293                               | 0.97897        |
|          | 2     | 0.37781                               | 0.99886        |
|          | 3     | 0.13992                               | 0.96067        |
| GLACT4M  | 1     | 0.34183                               | 0.97008        |
|          | 2     | 0.07681                               | 0.97550        |
|          | 3     | 0.13992                               | 0.96067        |
